# Supplementary material
Source: Springer Nature journal article supplement (https://www.springermedizin.de/resource/supplementary/13229_2012_67_MOESM1_ESM.pdf/9676090)
Supplement: MOESM1 [file 9676090]

Additional Table 1. Genotype and phenotype of the first 17 patients with ASDs tested.

| Patient | Genetics                                                           | Comments                                                                                                                                                                                                                                                                                                                                                                         | ID  | Seizures | Speech delay     | Motor impairment                            | Facial dysmorphisms                                                                                                                                                                                   | Aggressive/ repetitive behavior        | Other features                                                                                             |
|---------|--------------------------------------------------------------------|----------------------------------------------------------------------------------------------------------------------------------------------------------------------------------------------------------------------------------------------------------------------------------------------------------------------------------------------------------------------------------|-----|----------|------------------|---------------------------------------------|-------------------------------------------------------------------------------------------------------------------------------------------------------------------------------------------------------|----------------------------------------|------------------------------------------------------------------------------------------------------------|
| 1       | <i>NLGN4</i> p.Ala289Thr                                           | The change is considered to be pathogenic.                                                                                                                                                                                                                                                                                                                                       | no  | no       | yes              | no                                          | slight eversion of lower lip, attached earlobes                                                                                                                                                       | yes (hyperactivity)                    | overgrowth, recurrent ear infections                                                                       |
| 2       | <i>NLGN4</i> p.Ser259Pro                                           | The change is considered to be pathogenic.                                                                                                                                                                                                                                                                                                                                       | yes | no       | yes (regression) | yes ("clumsy" gross motor skills)           | depressed nasal bridge, broad nasal tip, full lips, attached earlobes                                                                                                                                 | yes (outbursts)                        | recurrent ear infections, abdomen striae                                                                   |
| 3       | ( <i>SHANK3</i> c.1304+48C>T) + (chr. 18p11.31 dup)                | The <i>SHANK3</i> change (SNP rs76224556) is supposed to affect the gene expression. Chr. 18p11.31 dup (position 6.1-6.5Mb, genome build hg 17). One gene involved ( <i>L3MBTL4</i> ). Patient's mother was normal by OGT array. The clinical significance of this variant is unclear.                                                                                           | yes | no       | yes (regression) | yes (regression)                            | slight bitemporal depression, slightly upslanting palpebral fissures, epicanthal folds, a thin upper lip with a bow shape, full cheeks                                                                | yes (aggressive/ repetitive behavior)  | overgrowth                                                                                                 |
| 4       | Chr. 2p21 dup + chr. 20p21.1 del                                   | Chr. 2p21 dup (approximately 563 kb, 45,265,479-45,828,359, genomic build hg 18). Two genes involved, one has an OMIM entry ( <i>PRKCE</i> ). Chr. 20p21.1 del (approximately 218 kb, 14,823,878-15,041,954, genomic build hg 18). One gene involved ( <i>MACROD2</i> ). No parental studies were performed. The clinical significance of these copy number variants is unclear. | yes | no       | yes              | yes                                         | prominent forehead and occiput, recessed eyes, mild epicanthal folds, triangular face, upslanted palpebral fissures, ptosis, full lips, thin hair, high arched palate, missing teeth and poor enamel, | no                                     | neonatal jaundice, macrocephaly, pectus excavatum, radial-ulnar synostosis, hydrocephalus, small penis     |
| 5       | Chr. 3p26.2 del                                                    | Chr. 3p26.2 deletion (159 kb, 4,067,922-4,227,267, genomic build hg 18). No genes involved. No parental studies were performed. The clinical significance of this copy loss is unclear.                                                                                                                                                                                          | yes | no       | yes              | yes (decreased fine and gross motor skills) | slightly flat midface                                                                                                                                                                                 | no                                     | sensitivity issues, neonatal jaundice                                                                      |
| 6       | Chr. 3p26.2 del                                                    | Chr. 3p26.2 deletion (159 kb, 4,067,922-4,227,267, genomic build hg 18). No genes involved. No parental studies were performed. The clinical significance of this copy loss is unclear.                                                                                                                                                                                          | yes | no       | yes              | no                                          | slightly flat midface                                                                                                                                                                                 | no                                     | sensitivity issues, neonatal jaundice                                                                      |
| 7       | No significant genetic finding                                     | Array-CGH and methylation arrays did not identified significant abnormalities.                                                                                                                                                                                                                                                                                                   | yes | no       | yes (regression) | no                                          | flat midface, full lips                                                                                                                                                                               | no                                     | no                                                                                                         |
| 8       | ( <i>SHANK3</i> c.1304+48C>T) + ( <i>EGR2</i> SNPs)                | The <i>SHANK3</i> change (SNP rs76224556) is supposed to affect the gene expression.                                                                                                                                                                                                                                                                                             | no  | yes      | yes              | yes                                         | bilateral epicanthal folds, slightly upturned nose, thickened helices and fleshy lobes at the ears                                                                                                    | no                                     | overgrowth                                                                                                 |
| 9       | <i>SHANK3</i> c.1304+48C>T                                         | The <i>SHANK3</i> change (SNP rs76224556) is supposed to affect the gene expression.                                                                                                                                                                                                                                                                                             | yes | yes      | yes              | yes (left spastic hemiparesis)              | full lips, a short philtrum, upslanting palpebral fissures, recessed-appearing eyes, unattached earlobes                                                                                              | yes (mannerism)                        | recurrent ear infections, sinus problems                                                                   |
| 10      | t(14;15, ish der(14)t(14;15)(q10?p10?) (D15Z1+),15q11q13(D15S10x2) | The translocation occurred <i>de novo</i> .                                                                                                                                                                                                                                                                                                                                      | yes | no       | yes (regression) | no                                          | no                                                                                                                                                                                                    | yes (aggressive/ hyperactive behavior) | positive family history for ID and speech delay (both sides), recurrent skin infections, EEG abnormalities |
| 11      | <i>FMRI</i> full methylation                                       | The change is considered to be pathogenic.                                                                                                                                                                                                                                                                                                                                       | yes | ukn      | ukn              | ukn                                         | ukn                                                                                                                                                                                                   | ukn                                    | ukn                                                                                                        |
| 12      | <i>FMRI</i> full methylation                                       | The change is considered to be pathogenic.                                                                                                                                                                                                                                                                                                                                       | yes | ukn      | ukn              | ukn                                         | ukn                                                                                                                                                                                                   | ukn                                    | ukn                                                                                                        |
| 13      | <i>FMRI</i> full methylation                                       | The change is considered to be pathogenic.                                                                                                                                                                                                                                                                                                                                       | yes | no       | yes              | yes                                         | no                                                                                                                                                                                                    | no                                     | kyphosis                                                                                                   |
| 14      | <i>FMRI</i> full methylation                                       | The change is considered to be pathogenic.                                                                                                                                                                                                                                                                                                                                       | yes | no       | no               | no                                          | no                                                                                                                                                                                                    | no                                     | no                                                                                                         |
| 15      | <i>MECP2</i> p.Arg168X                                             | The change is considered to be pathogenic.                                                                                                                                                                                                                                                                                                                                       | yes | yes      | yes (regression) | yes (stereotypical hand movements)          | ukn                                                                                                                                                                                                   | yes                                    | ukn                                                                                                        |
| 16      | <i>MECP2</i> p.Met158Thr                                           | The change is considered to be pathogenic.                                                                                                                                                                                                                                                                                                                                       | yes | yes      | yes (regression) | yes (regression)                            | no                                                                                                                                                                                                    | no                                     | microcephaly                                                                                               |
| 17      | <i>ZNF711</i> c.2157_2158 del TG; p.719fs*1                        | The change is considered to be pathogenic.                                                                                                                                                                                                                                                                                                                                       | yes | no       | yes              | no                                          | no                                                                                                                                                                                                    | yes                                    | no                                                                                                         |
